# Supplementary material
Source: publisher site journal article supplement (https://www.degruyter.com/publication/journal_key/AGMS/downloadAsset/AGMS_AGMS_flyer.pdf)
Supplement: Supplementary file 1 [file AGMS_AGMS_flyer.pdf]

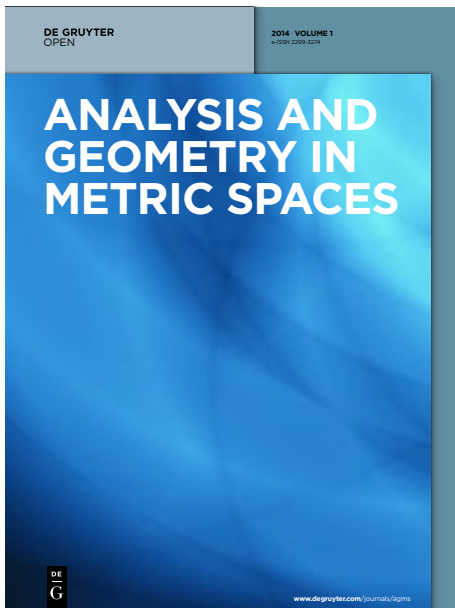

**Analysis and Geometry in Metric Spaces** is a fully peer-reviewed open access electronic journal that publishes cutting-edge research on analytical and geometrical problems in metric spaces and their mathematical applications. We strive to present a forum where all aspects of these problems can be discussed. The journal offers timely peer-review and quick publication of accepted papers.

### Scope of the journal

- ▶ Geometric inequalities in metric spaces
- ▶ Geometric measure theory and variational problems in metric spaces
- ▶ Analytic and geometric problems in metric measure spaces, probability spaces, and manifolds with density
- ▶ Analytic and geometric problems in subriemannian manifolds, Carnot groups, and pseudo-hermitian manifolds
- ▶ Geometric control theory
- ▶ Curvature in metric and length spaces
- ▶ Geometric group theory
- ▶ Harmonic Analysis. Potential theory
- ▶ Mass transportation problems
- ▶ Quasiconformal and quasiregular mappings. Quasiconformal geometry
- ▶ PDEs associated to analytic and geometric problems in metric spaces

---

### JOURNAL EDITOR:

**Manuel Ritoré**, University of Granada, Spain

### ASSISTANT EDITORS:

**Enrico Le Donne**, University of Jyväskylä, Finland

**Ana María Hurtado Cortegana**, University of Granada, Spain

**Matteo Galli**, Università di Bologna, Italy

---

### HOW TO SUBMIT:

[www.editorialmanager.com/agms](http://www.editorialmanager.com/agms)

---

### ADVISORY BOARD MEMBERS:

**Andrei Agrachev**, SISSA-ISAS, Italy

**Luigi Ambrosio**, Scuola Normale Superiore Pisa, Italy

**Zoltan Balogh**, Universität Bern, Switzerland

**Franck Barthe**, Université Paul-Sabatier, Toulouse, France

**Ugo Boscin**, CMAP École Polytechnique, Palaiseau, France

**Luca Capogna**, Worcester Polytechnic Institute, USA

**Sagun Chanillo**, Rutgers University, USA

**Giovanna Citti**, Università di Bologna, Italy

**Bruno Franchi**, Università di Bologna, Italy

**Nicola Garofalo**, Università di Padova, Italy

**Piotr Hajlasz**, University of Pittsburgh, USA

**Pekka Koskela**, University of Jyväskylä, Finland

**Urs Lang**, ETH Zürich, Switzerland

**Andrea Malchiodi**, Scuola Normale Superiore Pisa, Italy

**Gideon Schechtman**, Weizmann Institute, Israel

**Francesco Serra Cassano**, Università di Trento, Italy

**Karl-Theodor Sturm**, University of Bonn, Germany

**Tatiana Toro**, University of Washington, USA

**Dachun Yang**, Beijing Normal University, PRC

**Paul Yang**, Princeton University, USA
